# Supplementary material
Source: PubMed Central journal article supplement (PMC3402371)
Supplement: cn200044x_si_003.pdf [file cn200044x_si_003.pdf]

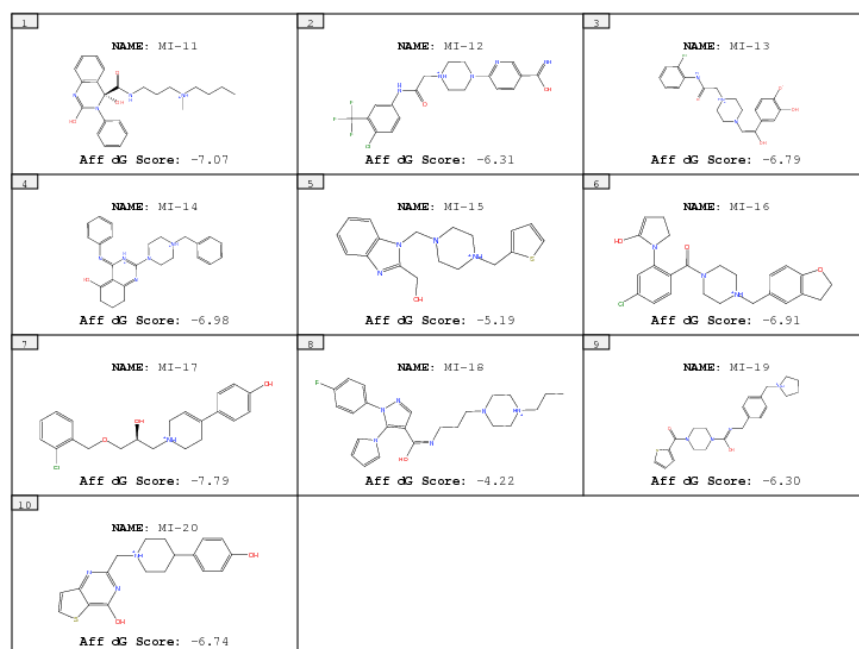

**Supplementary Figure A.** Virtual screening hits MI-11 through MI-20. Affinity dG docking score is indicated below each structure; as the value decreases, predicted binding affinity for the MAT target increases.

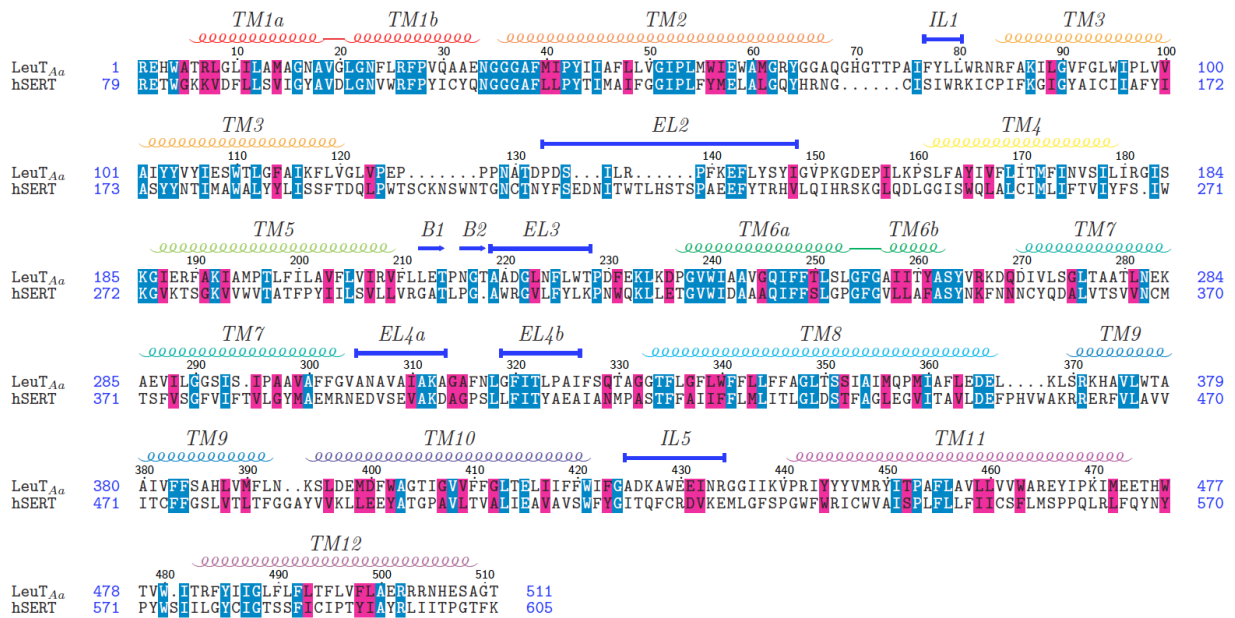

**Supplementary Figure B.** Sequence alignment of hSERT and LeuT<sub>Aa</sub>. Identical residues are highlighted in blue; similar residues are highlighted in pink. Membrane topology and residue numbers are indicated above the sequences. Gaps are represented by dots within the sequence.
